# Supplementary material for: Metabolic profiling and biological activity of twoLivistonaspecies:L. chinensisandL. australis
Source: Royal Society of Chemistry journal article supplement (doi:10.1039/d3ra01229h), 2023-01-01
Supplement: d3ra01229h1.pdf [file d3ra01229h1.pdf]

## **Supplementary Data**

### **Metabolic profiling and biological activity of two *Livistona* species:**

#### ***L. chinensis* and *L. australis***

Seham S. El-hawary<sup>1#</sup>, Ahlam Elwekeel<sup>2\*#</sup>, Sara O. Abo El-Ela<sup>2</sup>, Usama Ramadan Abdelmohsen<sup>3,4</sup>, and Asmaa I. Owis<sup>2,5</sup>

<sup>1</sup>Department of Pharmacognosy, Faculty of pharmacy, Cairo University, Cairo, Egypt

<sup>2</sup>Department of Pharmacognosy, Faculty of Pharmacy, Beni-Suef University, Beni-Suef, Egypt

<sup>3</sup>Department of Pharmacognosy, Faculty of Pharmacy, Minia University, Minia, Egypt

<sup>4</sup>Department of Pharmacognosy, Faculty of Pharmacy, Deraya University, New Minia, Egypt

<sup>5</sup>Department of Pharmacognosy, Faculty of Pharmacy, Heliopolis University for Sustainable Development, Cairo, Egypt

# These authors contributed equally to this work

\*Corresponding author

Ahlam Elwekeel

E-mail: [Ahlam\\_hasham2000@yahoo.com](mailto:Ahlam_hasham2000@yahoo.com)

[Ahlam.hassanain@pharm.bsu.edu.eg](mailto:Ahlam.hassanain@pharm.bsu.edu.eg)

## List of figures

|                                                                                                                           |
|---------------------------------------------------------------------------------------------------------------------------|
| Figure S1: LC-MS chromatogram of the <i>Livistona australis</i> leaves (Positive ion mode)                                |
| Figure S2: LC-MS chromatogram of the <i>Livistona australis</i> leaves (negative ion mode)                                |
| Figure S3: LC-MS chromatogram of the <i>Livistona australis</i> fruits (Positive ion mode)                                |
| Figure S4: LC-MS chromatogram of the <i>Livistona australis</i> fruits (negative ion mode)                                |
| Figure S5: LC-MS chromatogram of the <i>Livistona chinensis</i> leaves (Positive ion mode)                                |
| Figure S6: LC-MS chromatogram of the <i>Livistona chinensis</i> leaves (negative ion mode)                                |
| Figure S7: LC-MS chromatogram of the <i>Livistona chinensis</i> fruits (Positive ion mode).                               |
| Figure S8: LC-MS chromatogram of the <i>Livistona chinensis</i> fruits (negative ion mode)                                |
| Figure S9: $^1\text{H-NMR}$ spectrum of dodecanoic acid ( $\text{CDCl}_3$ )                                               |
| Figure S10: DEPT-Q NMR spectrum of dodecanoic acid (DMSO)                                                                 |
| Figure S11: $^1\text{H-NMR}$ spectrum of hyperoside ( $\text{CD}_3\text{OD}$ )                                            |
| Figure S12: DEPT-Q NMR spectrum of hyperoside ( $\text{CD}_3\text{OD}$ )                                                  |
| Figure S13: $^1\text{H-NMR}$ spectrum of quercetin 3- <i>O</i> - $\alpha$ -D-arabinopyranoside ( $\text{CD}_3\text{OD}$ ) |
| Figure S14: DEPT-Q NMR spectrum of quercetin 3- <i>O</i> - $\alpha$ -D-arabinopyranoside ( $\text{CD}_3\text{OD}$ )       |
| Figure S15: $^1\text{H-NMR}$ spectrum of gallic acid ( $\text{CD}_3\text{OD}$ )                                           |
| Figure S16: DEPT-Q NMR spectrum of gallic acid ( $\text{CD}_3\text{OD}$ )                                                 |
| Figure S17: $^1\text{H-NMR}$ spectrum of vanillic acid ( $\text{CD}_3\text{OD}$ )                                         |
| Figure S18: DEPT-Q NMR spectrum of vanillic acid ( $\text{CD}_3\text{OD}$ )                                               |
| Figure S19: $^1\text{H-NMR}$ spectrum of procatechuic acid ( $\text{CD}_3\text{OD}$ )                                     |
| Figure S20: DEPT-Q NMR spectrum of procatechuic acid ( $\text{CD}_3\text{OD}$ )                                           |

Base peak plot, MS1, m/z: 0.0000 - 1200.2422

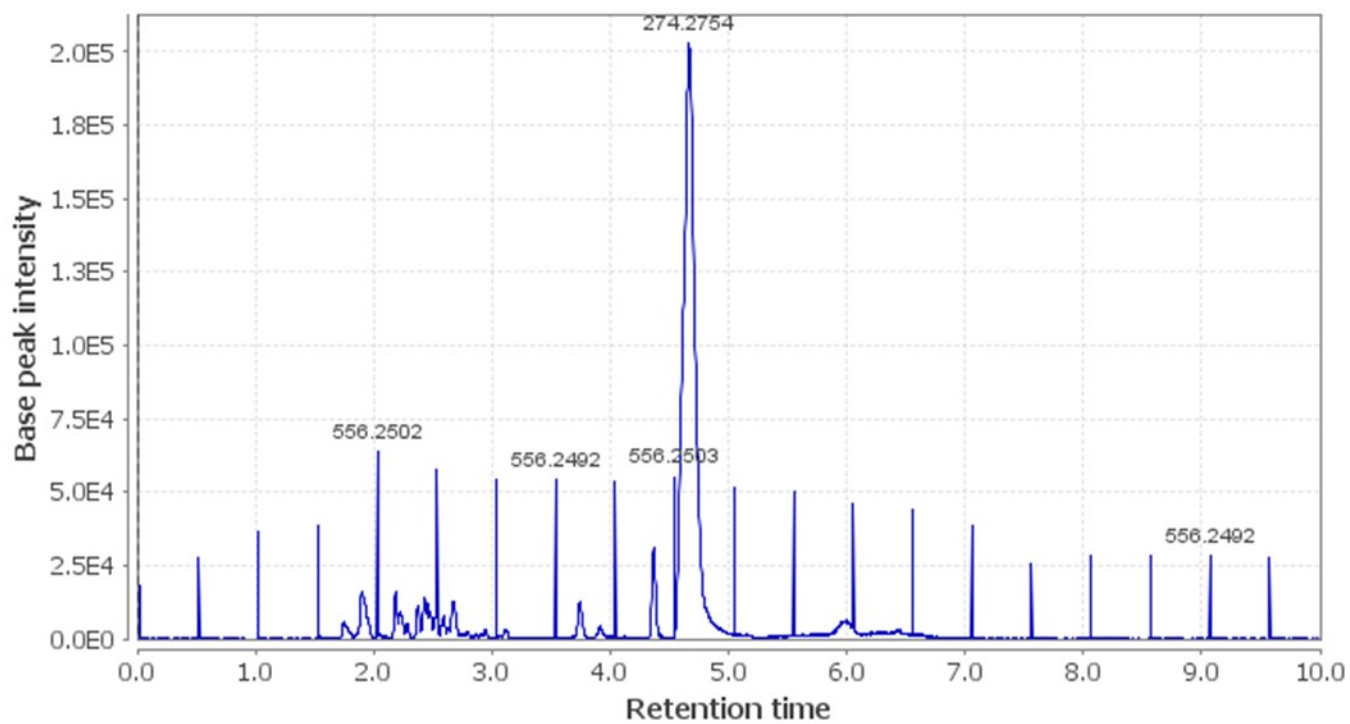

Figure S1: LC-MS chromatogram of the *Livistona australis* leaves (Positive ion mode)

Base peak plot, MS1, m/z: 0.0000 - 1200.2422

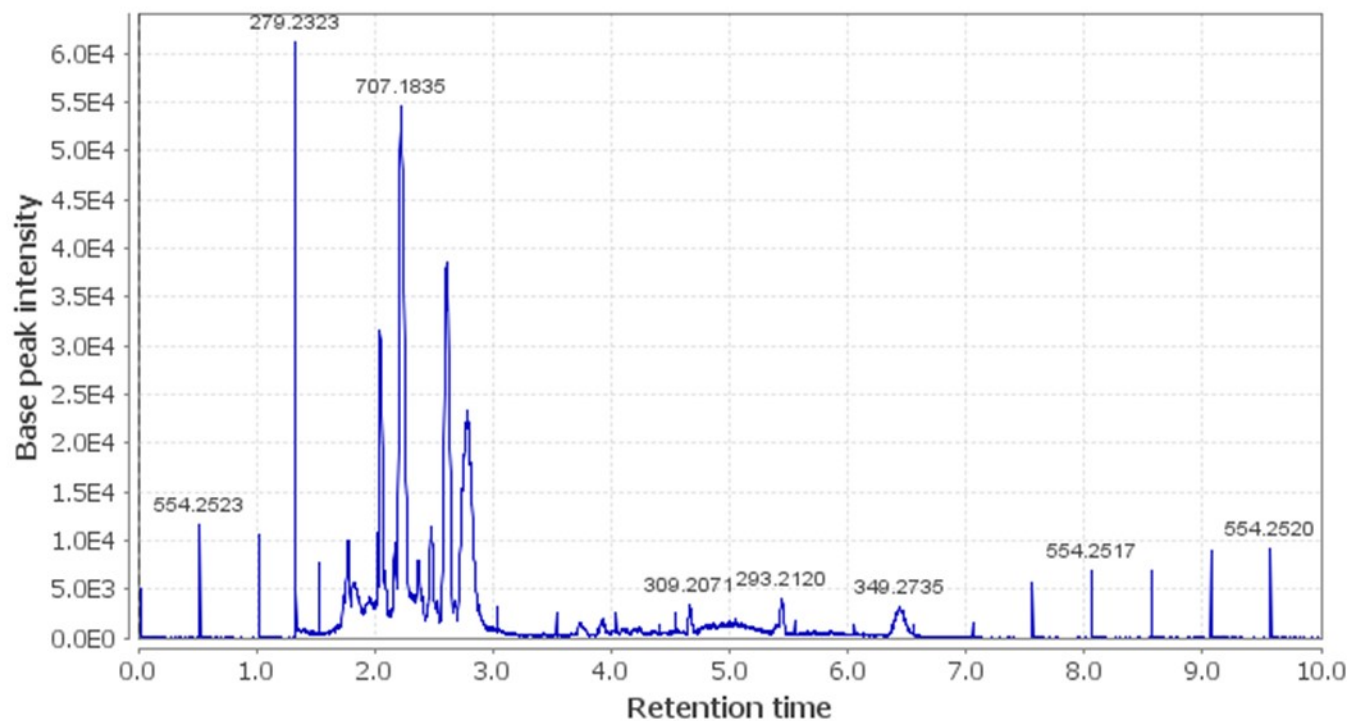

Figure S2: LC-MS chromatogram of the *Livistona australis* leaves (negative ion mode)

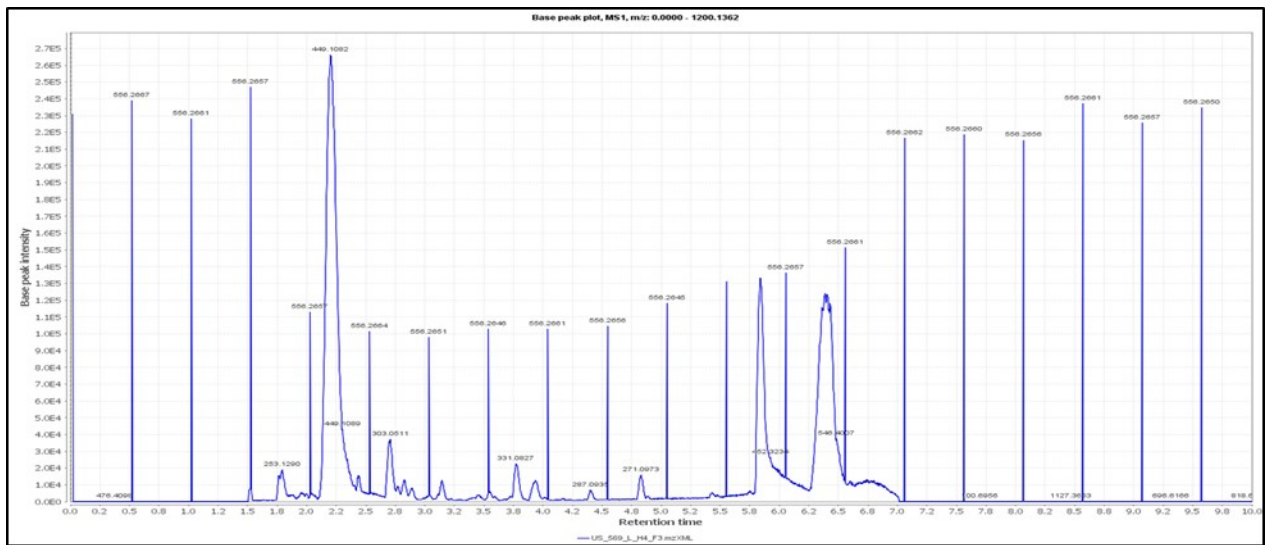

Figure S3: LC-MS chromatogram of the *Livistona australis* fruits (Positive ion mode)

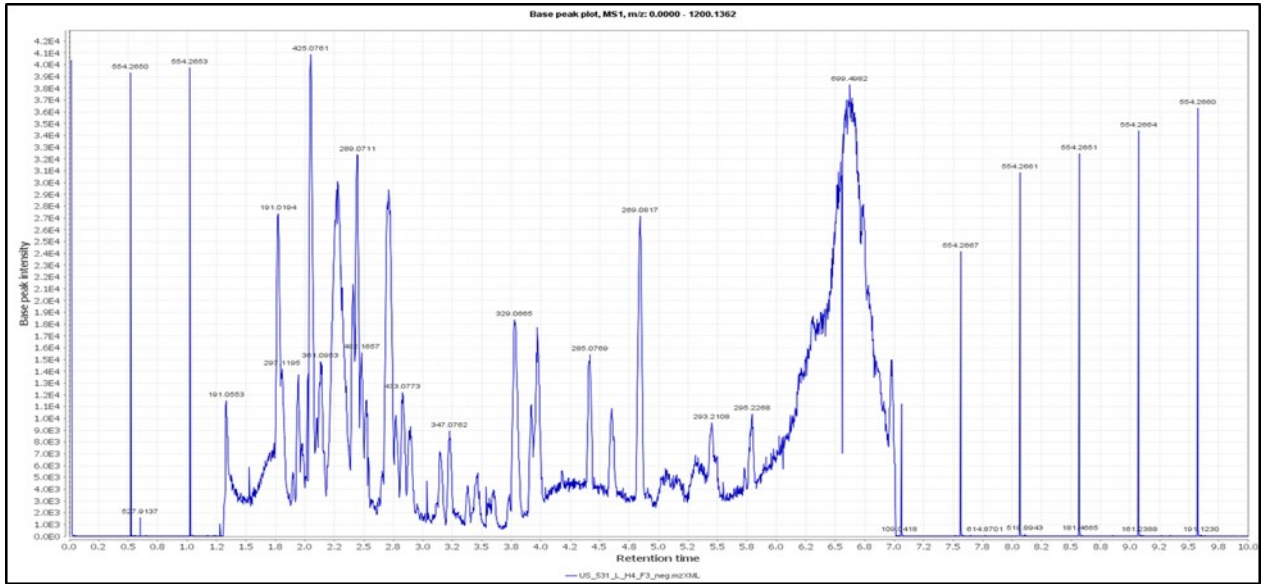

Figure S4: LC-MS chromatogram of the *Livistona australis* fruits (negative ion mode)

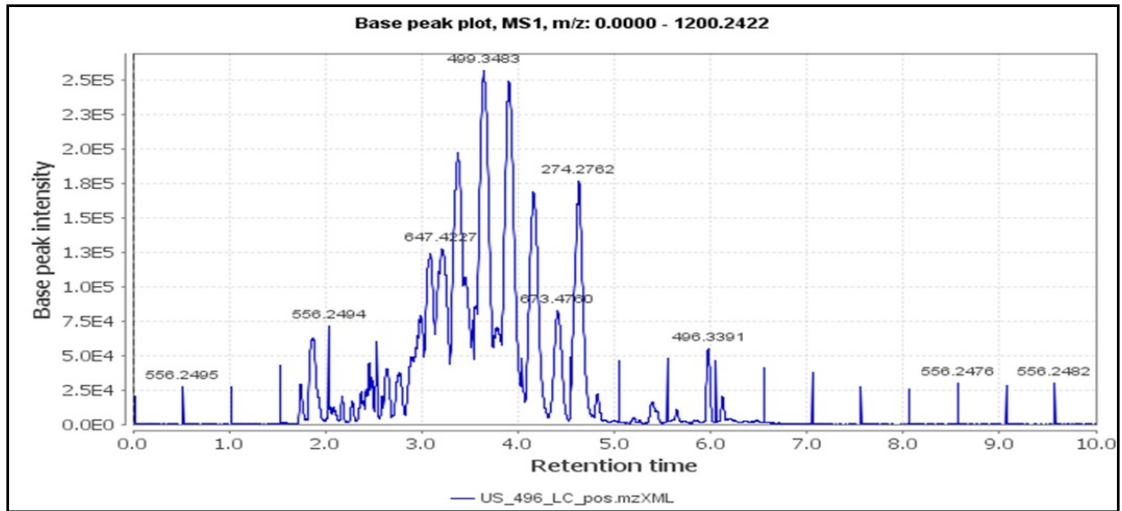

Figure S5: LC-MS chromatogram of the *Livistona chinensis* leaves (Positive ion mode)

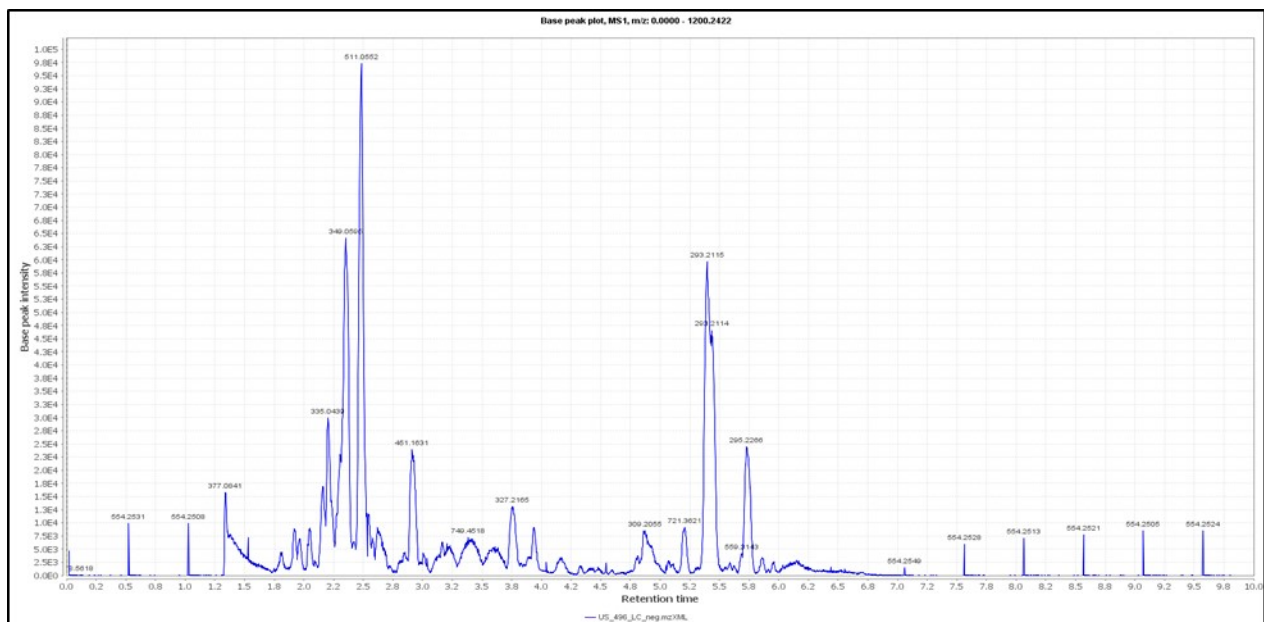

Figure S6: LC-MS chromatogram of the *Livistona chinensis* leaves (negative ion mode)



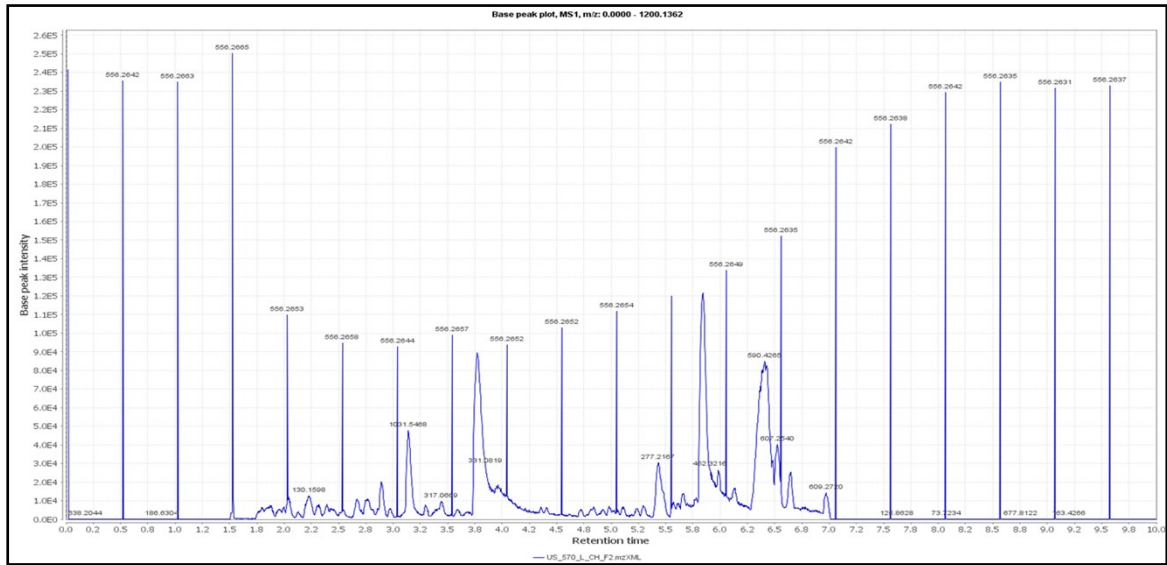

Figure S7: LC-MS chromatogram of the *Livistona chinensis* fruits (Positive ion mode).

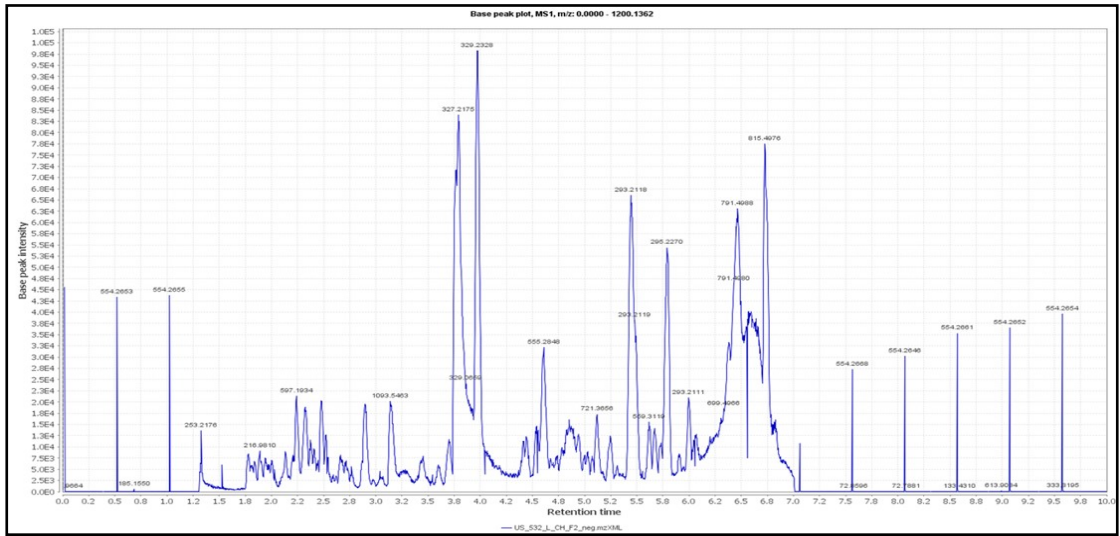

Figure S8: LC-MS chromatogram of the *Livistona chinensis* fruits (negative ion mode)

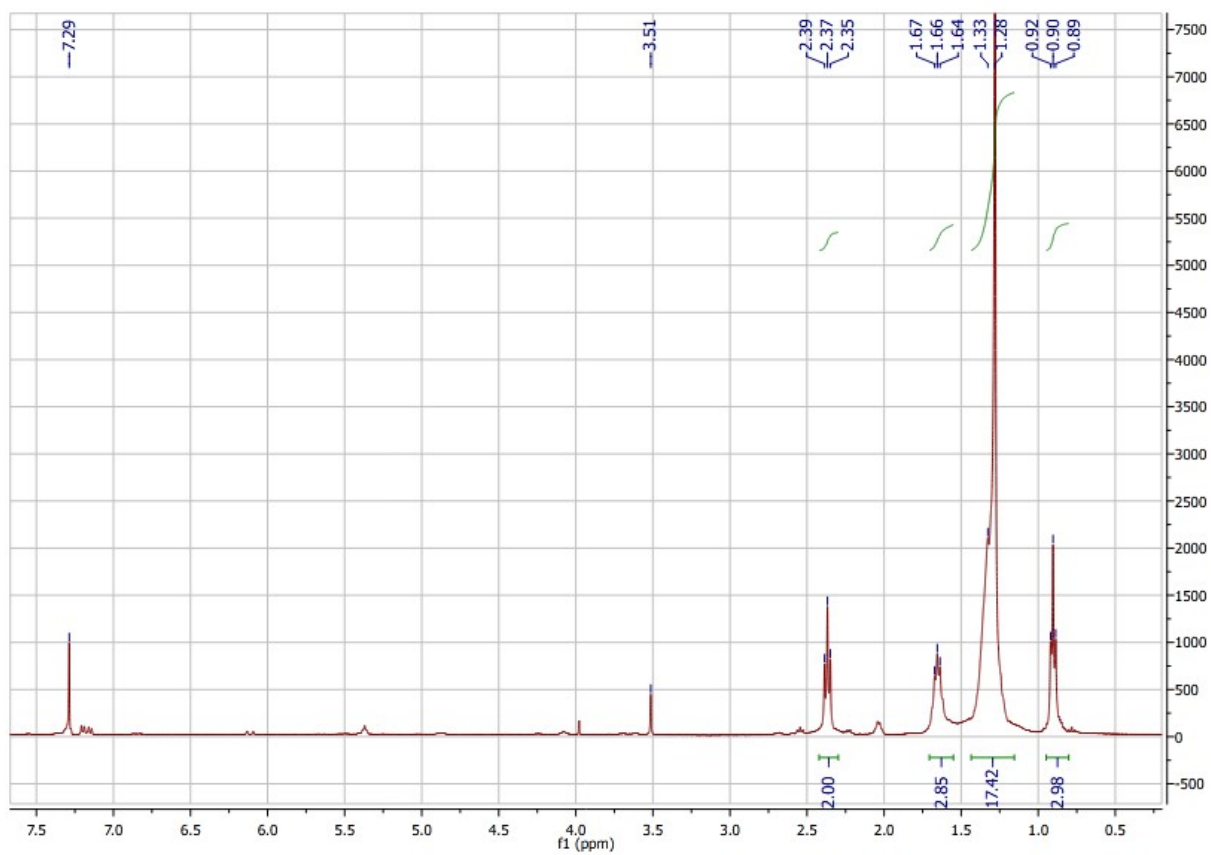

Figure S9:  $^1\text{H-NMR}$  spectrum of dodecanoic acid,  $\text{C}_{12}\text{H}_{24}\text{O}_2$  ( $\text{CDCl}_3$ )

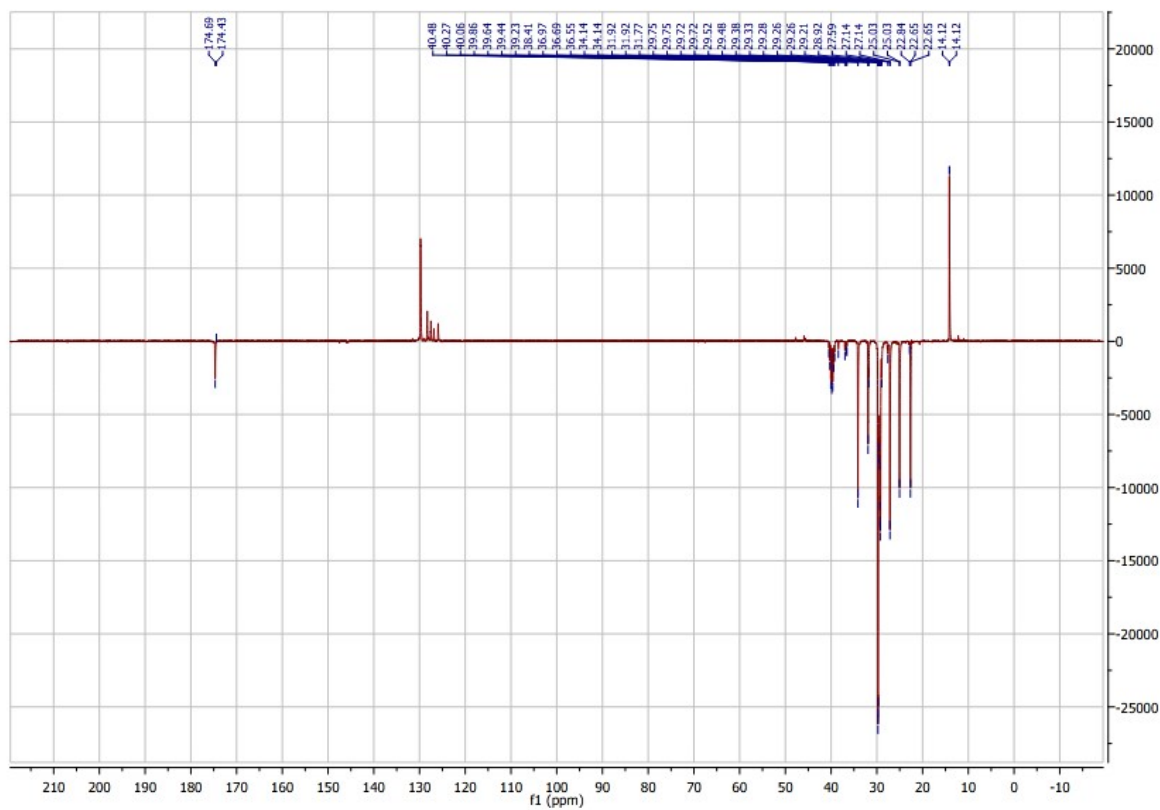

Figure S10: DEPT-Q NMR spectrum of dodecanoic acid;  $C_{12}H_{24}O_2$  (DMSO)

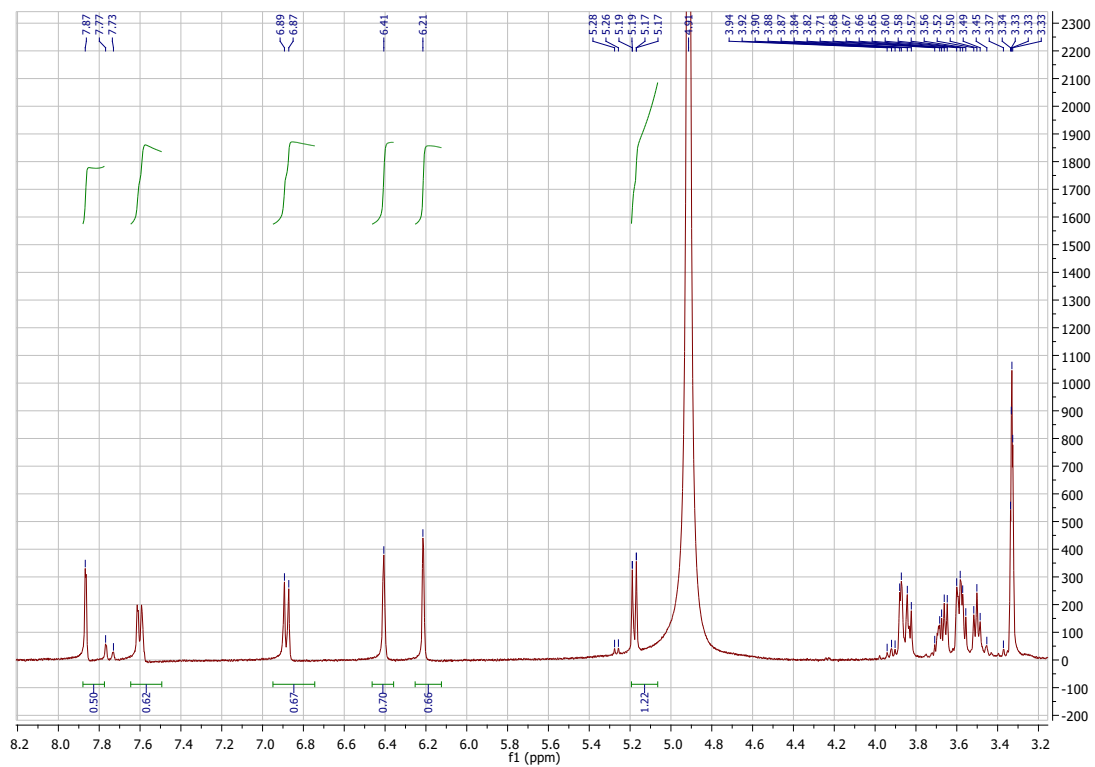

Figure S11: <sup>1</sup>H-NMR spectrum of hyperoside, C<sub>21</sub>H<sub>20</sub>O<sub>12</sub> (CD<sub>3</sub>OD)

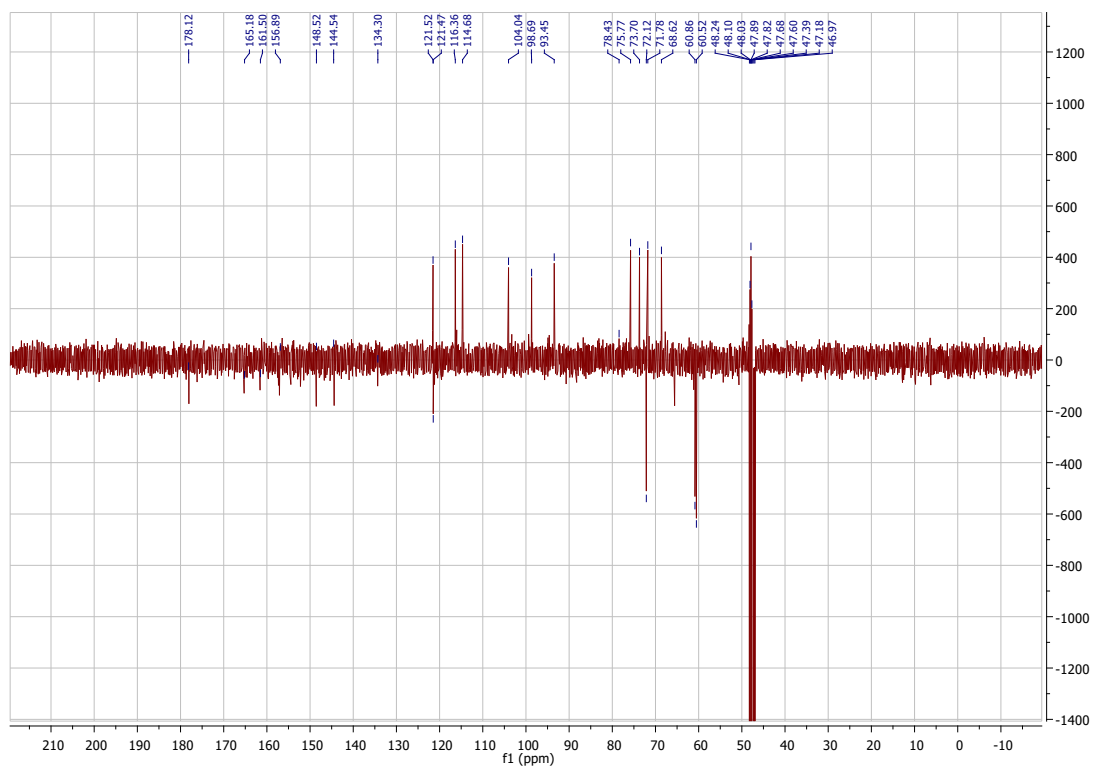

Figure S12: DEPT-Q NMR spectrum of hyperoside;  $C_{21}H_{20}O_{12}$  ( $CD_3OD$ )

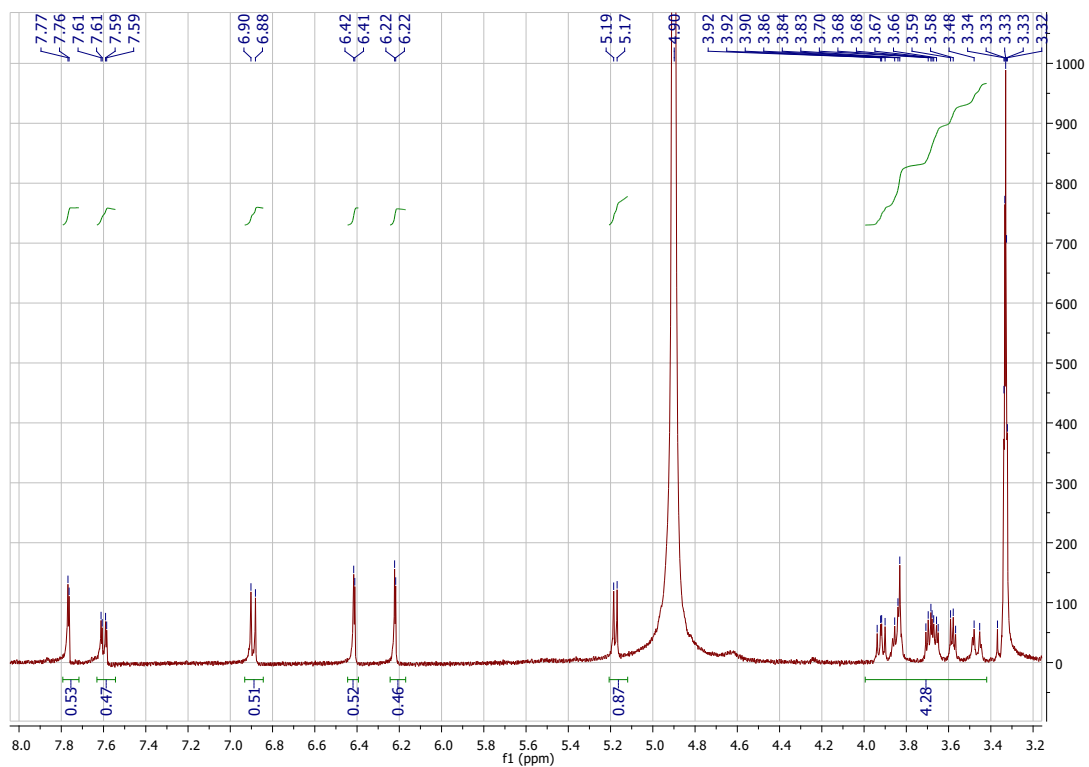

Figure S13:  $^1\text{H-NMR}$  spectrum of quercetin 3- $O$ - $\alpha$ -D-arabinopyranoside;  
 $\text{C}_{20}\text{H}_{18}\text{O}_{11}$  ( $\text{CD}_3\text{OD}$ )

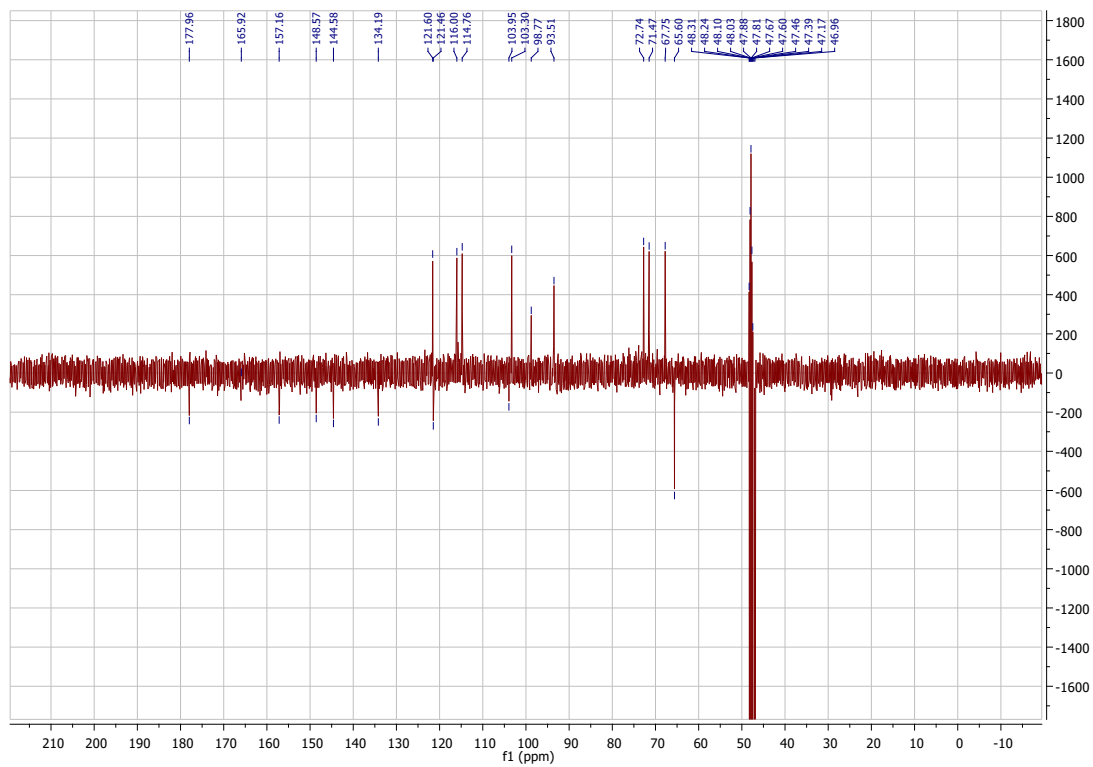

Figure S14: DEPT-Q NMR spectrum of quercetin 3-*O*- $\alpha$ -D-arabinopyranoside;  $C_{20}H_{18}O_{11}$  ( $CD_3OD$ )



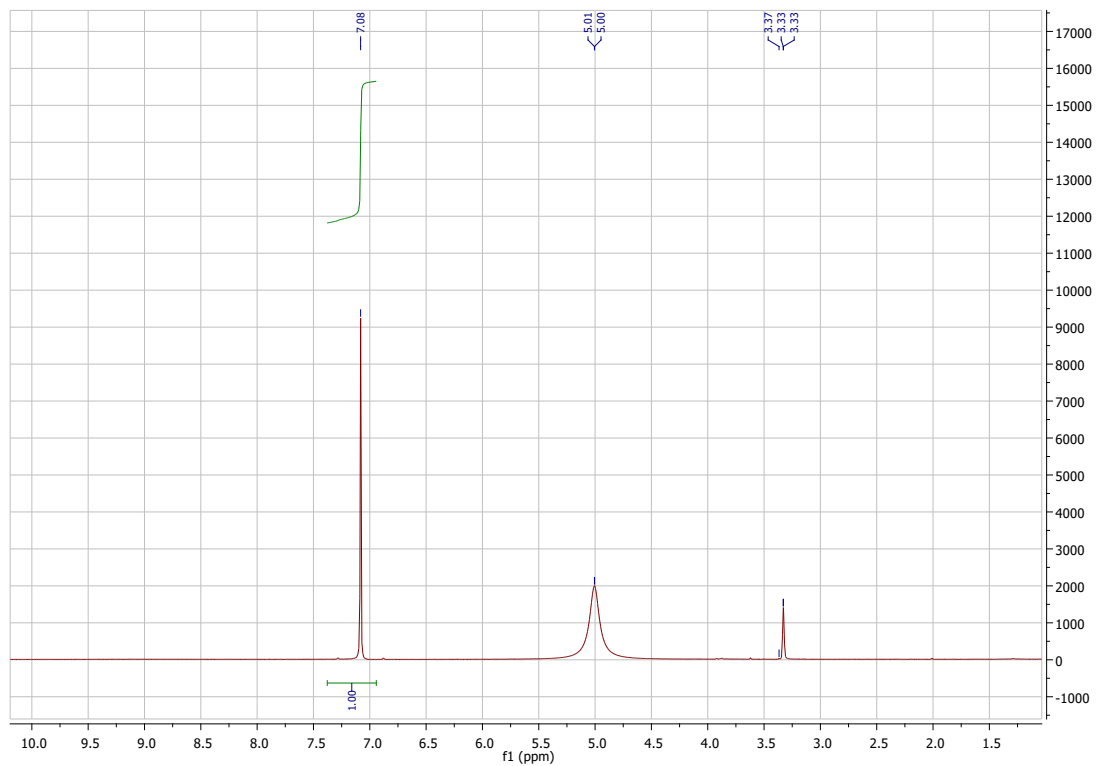

Figure S15:  $^1\text{H-NMR}$  spectrum of gallic acid;  $\text{C}_7\text{H}_6\text{O}_5$  ( $\text{CD}_3\text{OD}$ )

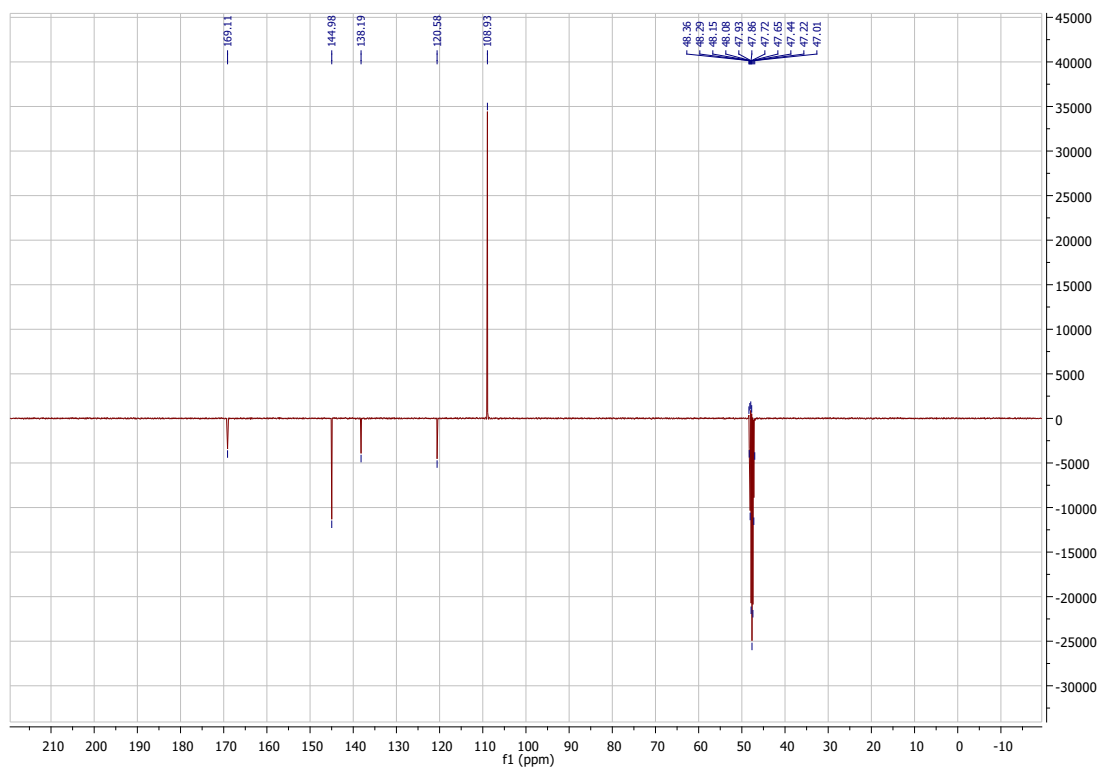

Figure S16: DEPT-Q NMR spectrum of gallic acid;  $C_7H_6O_5$  ( $CD_3OD$ )

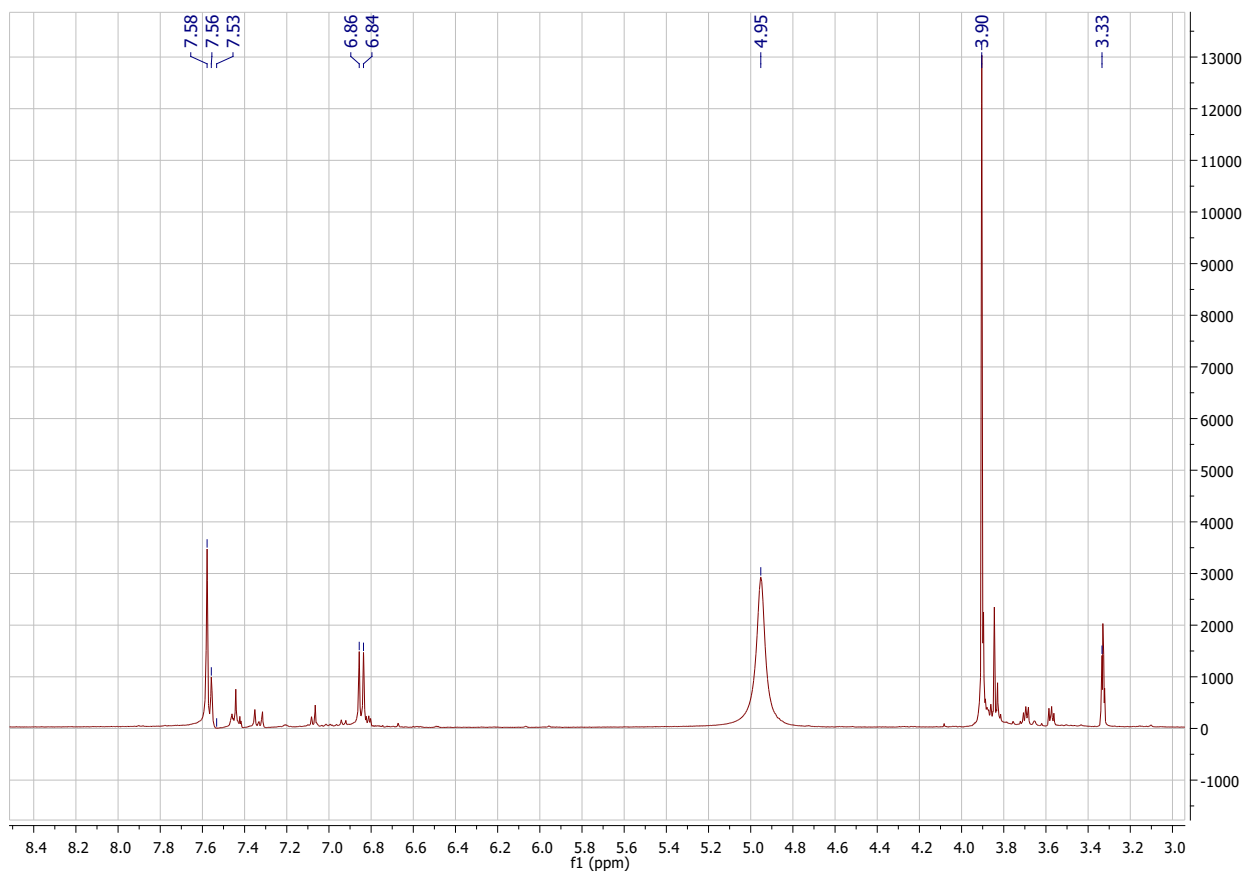

Figure S17:  $^1\text{H-NMR}$  spectrum of vanillic acid;  $\text{C}_8\text{H}_8\text{O}_4$  ( $\text{CD}_3\text{OD}$ )

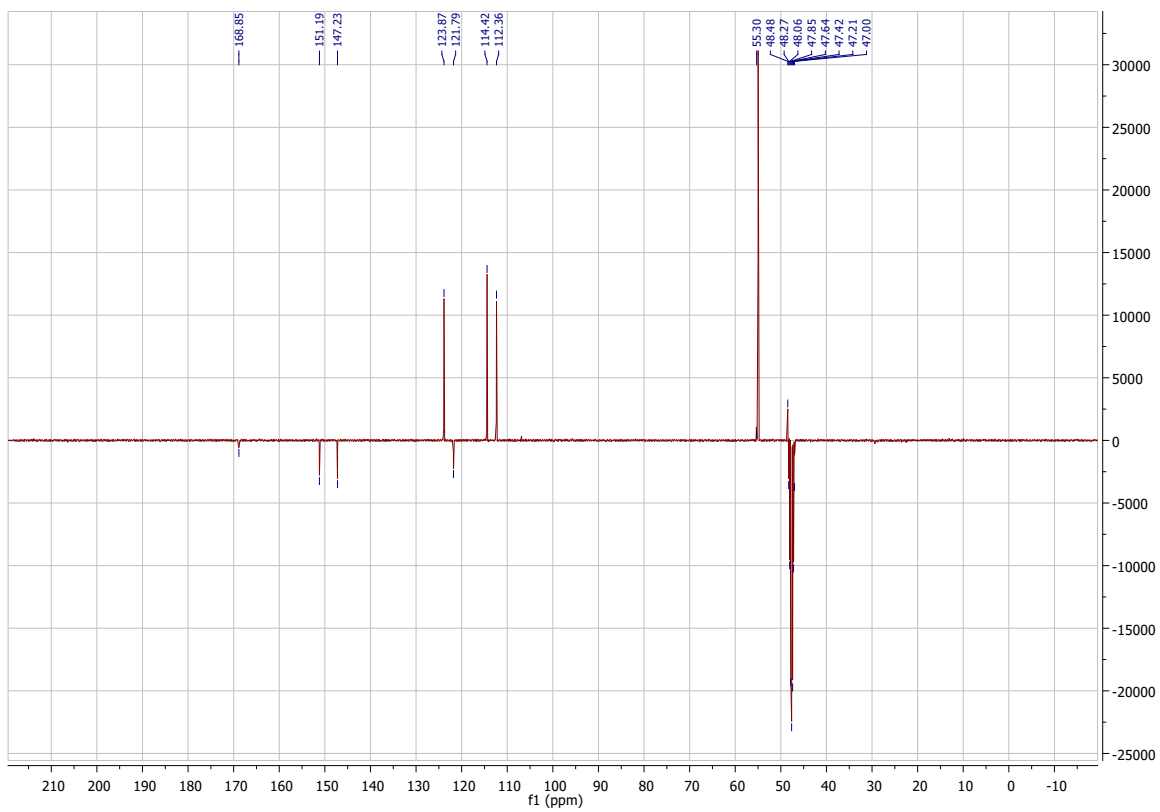

Figure S18: DEPT-Q NMR spectrum of vanillic acid;  $C_8H_8O_4$  ( $CD_3OD$ )

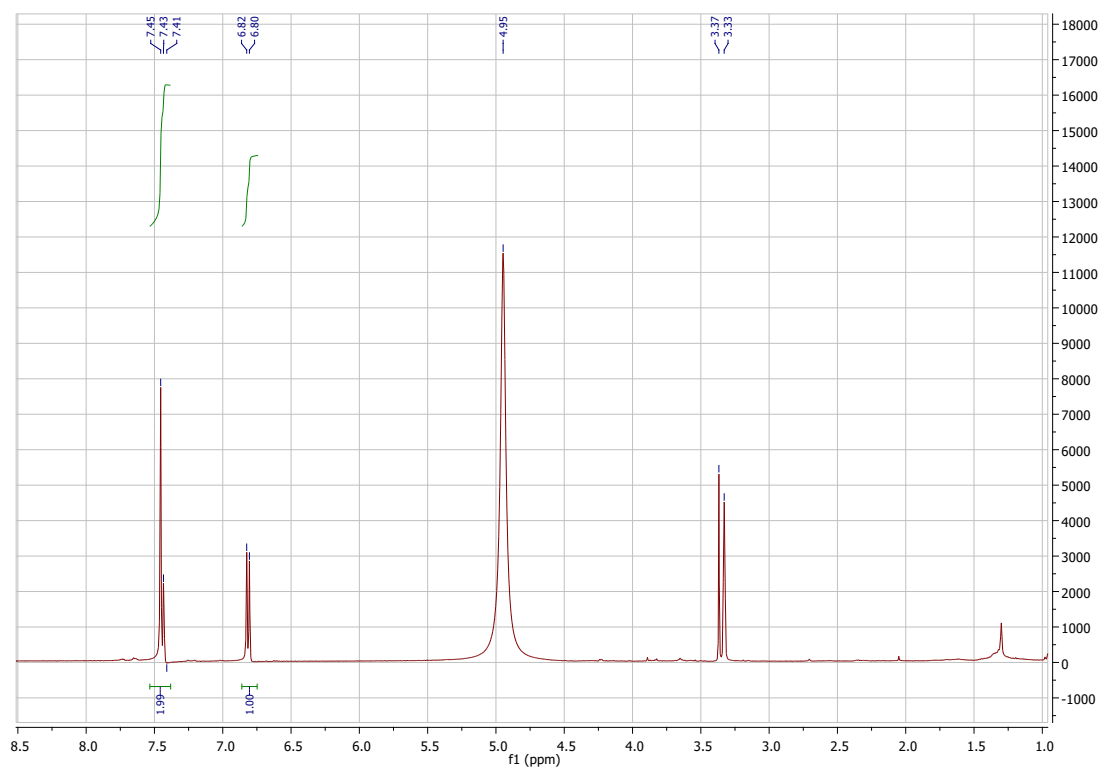

Figure S19: <sup>1</sup>H-NMR spectrum of procatechuic acid; C<sub>7</sub>H<sub>6</sub>O<sub>4</sub> (CD<sub>3</sub>OD)

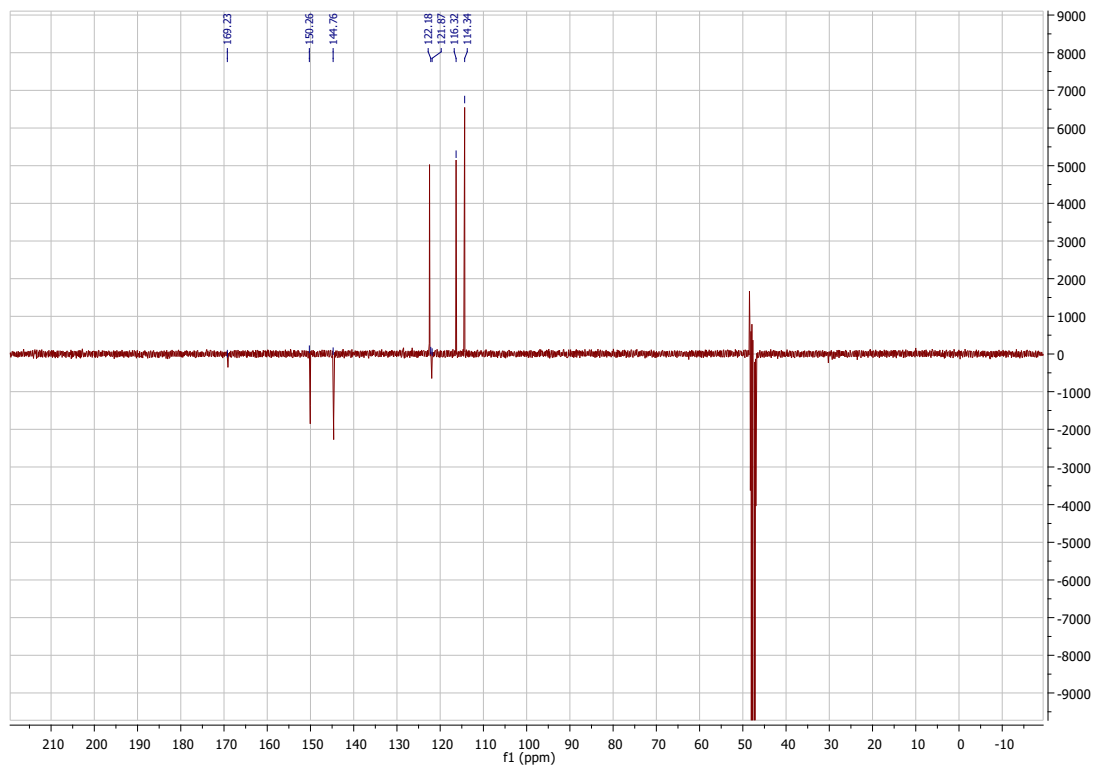

Figure S20: DEPT-Q NMR spectrum of procatechuic acid;  $C_7H_6O_4$  ( $CD_3OD$ )
